# Supplementary material for: groEL Gene-Based Phylogenetic Analysis of Lactobacillus Species by High-Throughput Sequencing
Source: MDPI journal article supplement (doi:10.3390/genes10070530), 2019-07-12
Supplement: s1 [file s1]

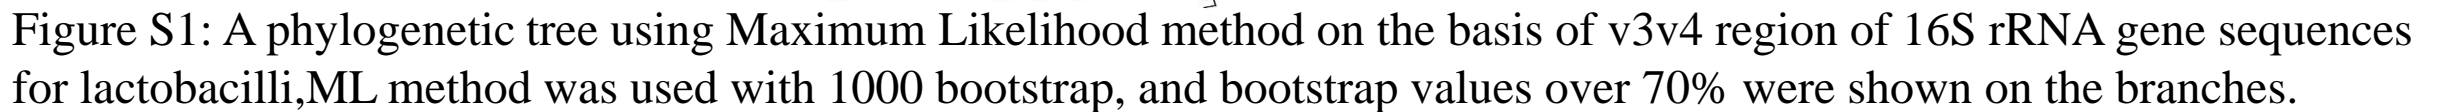

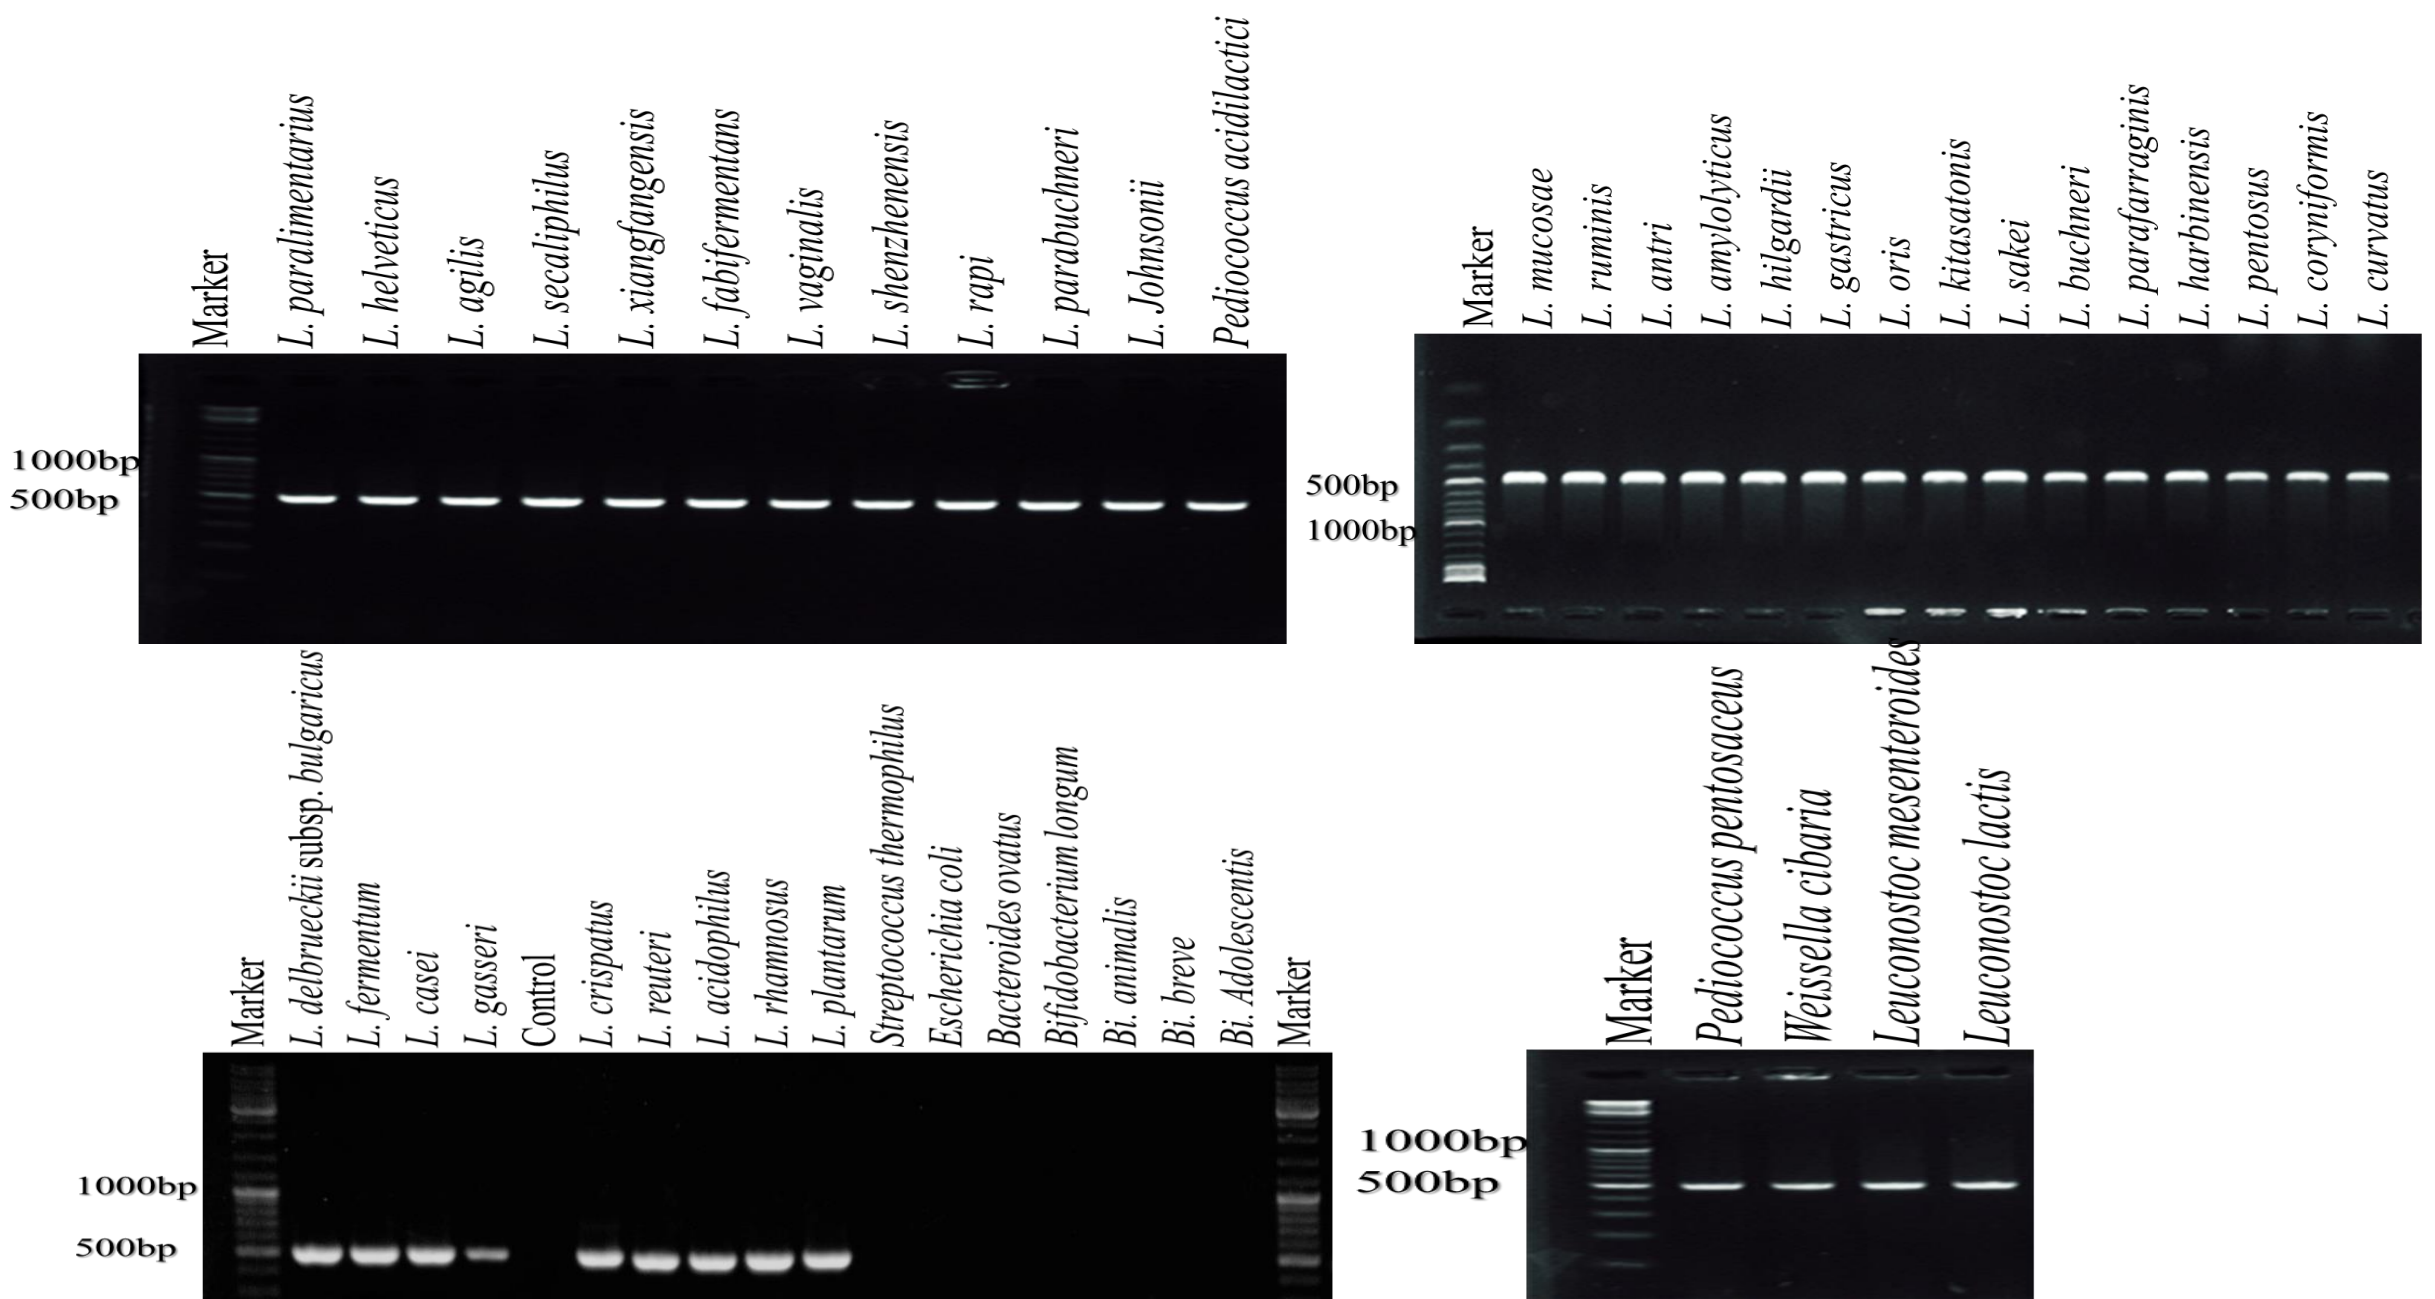

Figure S2: Specificity of the newly designed primer pair in amplifying the selected partial *groEL* gene.
